# Supplementary material for: Light intensity drives different growth strategies in two duckweed species: Lemna minor L. and Spirodela polyrhiza (L.) Schleiden
Source: PeerJ. 2021 Dec 20;9:e12698. doi: 10.7717/peerj.12698 (PMC8697765; doi:10.7717/peerj.12698)
Supplement: Supplemental Information 2 — Numbers of fronds, their surface area, respective growth rates and chlorophyll a concentrations. [file peerj-09-12698-s002.xlsx]

## Sheet: raw data
Light intensity	Habitat	Species	Frond nos. start/dish	Area start/dish [mm2]	Frond nos. end/dish	Area end/dish [mm2]	rN (fronds nos) [d-1]	rS (frond area) [d-1]	Sstart (frond area at the start) [mm2]	Send (frond area at the end) [mm2]	delta r = rS-rN	rN fronds Box-Cox	delta r Box-Cox	Send/Sstart	Species-habitat	Light intensity-species-habitat	Light intensity	Habitat	Species	Chlorophyll a [mg/g FW]	Fronds number	mg FW	mg FW per frond
1	Shady	Lemna	12	32.1	244	1149.7	0.188266	0.22365	2.675	4.71189	0.0353837	-0.426516	-1.09096	1.76145	L_s	1_L_s	0	Open	Lemna	0.8566	8	4.8	0.6
1	Shady	Lemna	11.5	33.4	207.5	1264.5	0.180799	0.227117	2.90435	6.09398	0.0463182	-0.427355	-1.07416	2.09823	L_s	1_L_s	0	Open	Lemna	0.7415	8	5.1	0.6375
1	Shady	Lemna	12	34.2	285	1334	0.197974	0.228982	2.85	4.6807	0.0310081	-0.425359	-1.09787	1.64235	L_s	1_L_s	0	Open	Lemna	0.6264	8	6.8	0.85
1	Shady	Lemna	12	35.2	268	1360	0.19413	0.228387	2.93333	5.07463	0.0342571	-0.425826	-1.09273	1.72999	L_s	1_L_s	0	Shady	Lemna	0.8891	12	10.3	0.858333
1	Shady	Lemna	12	31	247.5	1266.7	0.189156	0.231886	2.58333	5.11798	0.04273	-0.426413	-1.07961	1.98115	L_s	1_L_s	0	Shady	Lemna	0.8711	12	12.6	1.05
1	Shady	Lemna	11	24.4	121	579.3	0.149868	0.197952	2.21818	4.7876	0.0480839	-0.430371	-1.0715	2.15835	L_s	1_L_s	0	Shady	Lemna	0.9567	12	12.5	1.04167
1	Shady	Lemna	12	31.4	193.5	940.4	0.173773	0.212469	2.61667	4.85995	0.0386954	-0.428104	-1.08581	1.85731	L_s	1_L_s	0	Open	Spirodela	0.8947	3	6.5	2.16667
1	Shady	Lemna	11.5	27.2	242	1366.8	0.190412	0.244813	2.36522	5.64793	0.0544012	-0.426267	-1.06209	2.38791	L_s	1_L_s	0	Open	Spirodela	0.9794	3	9.3	3.1
1	Shady	Lemna	12	37.9	76	377.5	0.115364	0.143664	3.15833	4.96711	0.0282995	-0.432902	-1.10221	1.5727	L_s	1_L_s	0	Open	Spirodela	0.9516	3	6.8	2.26667
1	Shady	Lemna	12	29.8	195.5	1025.7	0.174416	0.221164	2.48333	5.24655	0.046748	-0.428037	-1.07351	2.1127	L_s	1_L_s	0	Shady	Spirodela	0.8368	3	10.2	3.4
1	Shady	Spirodela	5	68.8	90.5	1618.8	0.180994	0.19739	13.76	17.8873	0.0163953	-0.427333	-1.12207	1.29995	S_s	1_S_s	0	Shady	Spirodela	0.7258	3	8.6	2.86667
1	Shady	Spirodela	8	102.3	164	2718	0.188777	0.204984	12.7875	16.5732	0.0162073	-0.426457	-1.1224	1.29604	S_s	1_S_s	0	Shady	Spirodela	0.7219	3	9.1	3.03333
1	Shady	Spirodela	5.5	80.3	125.5	1951.2	0.195472	0.199402	14.6	15.5474	0.00392953	-0.425665	-1.1454	1.06489	S_s	1_S_s	1	Open	Lemna	0.9416	10.5	12.4	1.18095
1	Shady	Spirodela	6.5	84.6	140	2248.6	0.191865	0.205008	13.0154	16.0614	0.013143	-0.426096	-1.1278	1.23403	S_s	1_S_s	1	Open	Lemna	1.1647	9	11.3	1.25556
1	Shady	Spirodela	4.5	70.3	123	2046.3	0.206757	0.210689	15.6222	16.6366	0.00393186	-0.424248	-1.1454	1.06493	S_s	1_S_s	1	Open	Lemna	0.9883	10	15.4	1.54
1	Shady	Spirodela	6	60.2	122.5	1965.2	0.188522	0.217855	10.0333	16.0424	0.0293328	-0.426486	-1.10055	1.59892	S_s	1_S_s	1	Shady	Lemna	1.2297	9	13	1.44444
1	Shady	Spirodela	5.5	65.8	126.5	1956.2	0.195968	0.212009	11.9636	15.464	0.0160403	-0.425604	-1.12269	1.29259	S_s	1_S_s	1	Shady	Lemna	1.2718	13.5	15.6	1.15556
1	Shady	Spirodela	6	72.3	141	2149.6	0.197313	0.212013	12.05	15.2454	0.0147008	-0.42544	-1.12504	1.26518	S_s	1_S_s	1	Shady	Lemna	1.1357	11	15.5	1.40909
1	Shady	Spirodela	5	69.4	112	1764.7	0.194316	0.202241	13.88	15.7562	0.00792426	-0.425804	-1.13743	1.13518	S_s	1_S_s	1	Open	Spirodela	1.0565	4.5	11.7	2.6
1	Shady	Spirodela	5.5	61	122	1703.3	0.193705	0.208091	11.0909	13.9615	0.014386	-0.425877	-1.12559	1.25882	S_s	1_S_s	1	Open	Spirodela	1.1211	4	14.1	3.525
2	Shady	Lemna	12	30.7	416.5	2008.8	0.221686	0.261314	2.55833	4.82305	0.0396281	-0.422213	-1.08437	1.88523	L_s	2_L_s	1	Open	Spirodela	0.9708	4	14.6	3.65
2	Shady	Lemna	12	29	354	1603.2	0.211524	0.250779	2.41667	4.52881	0.0392544	-0.423618	-1.08494	1.87399	L_s	2_L_s	1	Shady	Spirodela	1.0533	5	21.1	4.22
2	Shady	Lemna	12	31.5	390.5	1803.6	0.217658	0.252972	2.625	4.61869	0.0353144	-0.42278	-1.09107	1.7595	L_s	2_L_s	1	Shady	Spirodela	1.1484	5	15.4	3.08
2	Shady	Lemna	12	30.2	157	701.4	0.160709	0.196577	2.51667	4.46752	0.0358686	-0.429397	-1.0902	1.77517	L_s	2_L_s	1	Shady	Spirodela	0.9886	4	20.3	5.075
2	Shady	Lemna	12	30.5	283.5	1241.3	0.197644	0.231637	2.54167	4.37848	0.0339926	-0.4254	-1.09315	1.72268	L_s	2_L_s	2	Open	Lemna	0.8156	10.5	17.6	1.67619
2	Shady	Lemna	12	33.3	294	1271.7	0.199917	0.22766	2.775	4.32551	0.0277425	-0.425119	-1.10311	1.55874	L_s	2_L_s	2	Open	Lemna	0.82	11	13.8	1.25455
2	Shady	Lemna	12	36.9	384.5	1597.8	0.21669	0.235511	3.075	4.15553	0.0188209	-0.422914	-1.1179	1.35139	L_s	2_L_s	2	Open	Lemna	0.7103	10	20.3	2.03
2	Shady	Lemna	12	42.3	332.5	1567.5	0.207608	0.225778	3.525	4.71429	0.0181698	-0.424136	-1.11901	1.33739	L_s	2_L_s	2	Shady	Lemna	1.0197	12	18.4	1.53333
2	Shady	Lemna	12	37.1	383	1863.1	0.216446	0.244774	3.09167	4.86449	0.0283282	-0.422948	-1.10217	1.57342	L_s	2_L_s	2	Shady	Lemna	1.0342	9.5	11.4	1.2
2	Shady	Lemna	13	33.7	264	1203.7	0.188187	0.223479	2.59231	4.55947	0.0352911	-0.426525	-1.09111	1.75885	L_s	2_L_s	2	Shady	Lemna	1.0614	10.5	14.6	1.39048
2	Shady	Spirodela	9.5	119.3	181.5	2938	0.184373	0.20024	12.5579	16.1873	0.0158674	-0.426959	-1.12299	1.28902	S_s	2_S_s	2	Open	Spirodela	0.9261	5	30.7	6.14
2	Shady	Spirodela	4.5	71.3	144.5	2400.4	0.216825	0.219781	15.8444	16.6118	0.00295576	-0.422896	-1.14749	1.04843	S_s	2_S_s	2	Open	Spirodela	1.0368	4	14.9	3.725
2	Shady	Spirodela	6.5	90.2	166	2490.6	0.202512	0.207391	13.8769	15.0036	0.00487899	-0.424793	-1.14343	1.08119	S_s	2_S_s	2	Open	Spirodela	0.7678	4.5	18.1	4.02222
2	Shady	Spirodela	4	47.9	105.5	1879.5	0.204526	0.229353	11.975	17.8152	0.0248268	-0.424536	-1.10787	1.4877	S_s	2_S_s	2	Shady	Spirodela	0.9514	4.5	19.6	4.35556
2	Shady	Spirodela	5	70.8	118	2057.8	0.197578	0.210596	14.16	17.439	0.0130179	-0.425408	-1.12802	1.23157	S_s	2_S_s	2	Shady	Spirodela	0.8824	4	34.2	8.55
2	Shady	Spirodela	6.5	68.2	156.5	2236.7	0.198828	0.218145	10.4923	14.292	0.0193162	-0.425254	-1.11706	1.36214	S_s	2_S_s	2	Shady	Spirodela	0.8184	4	34.7	8.675
2	Shady	Spirodela	5.5	53.2	122	1988.3	0.193705	0.226311	9.67273	16.2975	0.0326065	-0.425877	-1.09533	1.6849	S_s	2_S_s	3	Open	Lemna	0.6369	9	19.1	2.12222
2	Shady	Spirodela	5.5	57.9	116.5	1545.8	0.190821	0.205286	10.5273	13.2687	0.0144648	-0.426219	-1.12545	1.26041	S_s	2_S_s	3	Open	Lemna	0.6774	10	17.5	1.75
2	Shady	Spirodela	5.5	72.6	163	2340.8	0.211813	0.21708	13.2	14.3607	0.00526756	-0.423579	-1.14264	1.08793	S_s	2_S_s	3	Open	Lemna	0.7114	9.5	18.8	1.97895
2	Shady	Spirodela	5.5	66.1	123	1862.4	0.194215	0.208653	12.0182	15.1415	0.0144385	-0.425816	-1.1255	1.25988	S_s	2_S_s	3	Shady	Lemna	0.9355	11	17.7	1.60909
3	Shady	Lemna	12	33.3	369	1624.6	0.214118	0.242966	2.775	4.40271	0.0288481	-0.423267	-1.10133	1.58656	L_s	3_L_s	3	Shady	Lemna	0.9821	13.5	20.9	1.54815
3	Shady	Lemna	12	36.6	377.5	1423.1	0.215541	0.228784	3.05	3.7698	0.0132425	-0.423073	-1.12762	1.236	L_s	3_L_s	3	Shady	Lemna	0.8873	11.5	19.6	1.70435
3	Shady	Lemna	12	35.6	346.5	1504.4	0.210186	0.233988	2.96667	4.3417	0.0238017	-0.423796	-1.10955	1.4635	L_s	3_L_s	3	Open	Spirodela	0.8437	5	33.6	6.72
3	Shady	Lemna	12	36.9	241	1099.1	0.187493	0.212127	3.075	4.56058	0.0246341	-0.426605	-1.10818	1.48312	L_s	3_L_s	3	Open	Spirodela	0.7976	4.5	32.9	7.31111
3	Shady	Lemna	12	33.7	229	1120	0.184301	0.218974	2.80833	4.89083	0.0346732	-0.426967	-1.09208	1.74154	L_s	3_L_s	3	Open	Spirodela	0.8111	4	33.4	8.35
3	Shady	Lemna	12	35.6	230	914.3	0.184573	0.202863	2.96667	3.97522	0.01829	-0.426936	-1.11881	1.33996	L_s	3_L_s	3	Shady	Spirodela	0.8377	4.5	30.8	6.84444
3	Shady	Lemna	12	35.7	307	1356.6	0.202621	0.227349	2.975	4.41889	0.0247278	-0.424779	-1.10803	1.48534	L_s	3_L_s	3	Shady	Spirodela	0.8356	5.5	29.1	5.29091
3	Shady	Lemna	12	36.1	339	1500.1	0.208818	0.232937	3.00833	4.42507	0.0241188	-0.423977	-1.10903	1.47094	L_s	3_L_s	3	Shady	Spirodela	0.83665	4	38	9.5
3	Shady	Lemna	12	32.4	371	1472.7	0.214456	0.238543	2.7	3.96954	0.0240874	-0.423221	-1.10908	1.4702	L_s	3_L_s
3	Shady	Lemna	12	33.7	341	1210.6	0.209186	0.223836	2.80833	3.55015	0.0146499	-0.423929	-1.12513	1.26415	L_s	3_L_s	0 - in the field
3	Shady	Spirodela	5	63.7	28	511.6	0.107673	0.13021	12.74	18.2714	0.022537	-0.433352	-1.11165	1.43418	S_s	3_S_s	1 - 125 µmol photons m–2 s–1
3	Shady	Spirodela	7	64.5	124	2052.6	0.179648	0.216262	9.21429	16.5532	0.0366141	-0.42748	-1.08904	1.79647	S_s	3_S_s	2 - 236
3	Shady	Spirodela	6.5	93	160	2630.5	0.200211	0.208896	14.3077	16.4406	0.00868488	-0.425082	-1.13598	1.14908	S_s	3_S_s	3 - 459
3	Shady	Spirodela	7	108.1	162.5	2885.5	0.196548	0.205275	15.4429	17.7569	0.00872681	-0.425534	-1.1359	1.14985	S_s	3_S_s
3	Shady	Spirodela	4	22.7	42.5	624.3	0.147701	0.207142	5.675	14.6894	0.059441	-0.430555	-1.05469	2.58844	S_s	3_S_s
3	Shady	Spirodela	4	32	57.5	924	0.166593	0.210186	8	16.0696	0.0435928	-0.428831	-1.07829	2.0087	S_s	3_S_s
3	Shady	Spirodela	6.5	93.3	117.5	2018.7	0.180915	0.192149	14.3538	17.1804	0.0112345	-0.427342	-1.13125	1.19692	S_s	3_S_s
3	Shady	Spirodela	4	54.4	70	1205.3	0.178888	0.193632	13.6	17.2186	0.0147449	-0.427563	-1.12496	1.26607	S_s	3_S_s
3	Shady	Spirodela	6.5	77.8	123	2037.4	0.183774	0.204081	11.9692	16.5642	0.0203066	-0.427026	-1.11538	1.3839	S_s	3_S_s
3	Shady	Spirodela	7	105.9	130.5	2520.9	0.182841	0.198117	15.1286	19.3172	0.0152758	-0.42713	-1.12403	1.27687	S_s	3_S_s
1	Open	Lemna	12	36	360	2523.9	0.212575	0.265628	3	7.01083	0.0530528	-0.423477	-1.06409	2.33694	L_o	1_L_o
1	Open	Lemna	12	36.3	445	2190.3	0.225823	0.256249	3.025	4.92202	0.0304255	-0.421617	-1.0988	1.62711	L_o	1_L_o
1	Open	Lemna	12	33.5	441.5	2840.2	0.225329	0.277505	2.79167	6.43307	0.0521758	-0.421689	-1.06539	2.30438	L_o	1_L_o
1	Open	Lemna	12	36.6	442	2748.6	0.2254	0.269925	3.05	6.21855	0.0445247	-0.421678	-1.07688	2.03887	L_o	1_L_o
1	Open	Lemna	12	40.5	472.5	3027.2	0.229571	0.269631	3.375	6.40677	0.04006	-0.421064	-1.0837	1.8983	L_o	1_L_o
1	Open	Lemna	12	35.9	435	2554	0.224402	0.266542	2.99167	5.87126	0.04214	-0.421823	-1.08051	1.96254	L_o	1_L_o
1	Open	Lemna	12	36.1	460.5	2724.1	0.227963	0.270225	3.00833	5.91553	0.0422621	-0.421303	-1.08032	1.96638	L_o	1_L_o
1	Open	Lemna	12	36.2	427	2834.4	0.223242	0.272533	3.01667	6.63794	0.0492906	-0.421991	-1.06969	2.20042	L_o	1_L_o
1	Open	Lemna	12	40	424.5	2725.9	0.222875	0.263855	3.33333	6.42144	0.0409793	-0.422043	-1.08229	1.92643	L_o	1_L_o
1	Open	Lemna	12	32	414.5	2323.4	0.221385	0.267816	2.66667	5.60531	0.0464303	-0.422256	-1.07399	2.10199	L_o	1_L_o
1	Open	Spirodela	4	33.3	98	1835.7	0.199917	0.250601	8.325	18.7316	0.0506844	-0.425119	-1.06761	2.25005	S_o	1_S_o
1	Open	Spirodela	4	40.6	133	2499.5	0.219003	0.257505	10.15	18.7932	0.0385014	-0.422592	-1.08611	1.85155	S_o	1_S_o
1	Open	Spirodela	4.5	47	101.5	1924.1	0.194749	0.232004	10.4444	18.9567	0.0372553	-0.425752	-1.08804	1.815	S_o	1_S_o
1	Open	Spirodela	4.5	49.2	117.5	1909	0.203898	0.228653	10.9333	16.2468	0.024755	-0.424616	-1.10798	1.48599	S_o	1_S_o
1	Open	Spirodela	4.5	43.2	122.5	2344.9	0.206502	0.249635	9.6	19.142	0.0431327	-0.424281	-1.07899	1.99396	S_o	1_S_o
1	Open	Spirodela	4	41.3	140.5	2599.6	0.222432	0.258891	10.325	18.5025	0.0364586	-0.422107	-1.08928	1.79201	S_o	1_S_o
1	Open	Spirodela	4	29.5	116.5	1874.2	0.210725	0.259472	7.375	16.0876	0.0487469	-0.423725	-1.07051	2.18136	S_o	1_S_o
1	Open	Spirodela	4	51.5	138	2908.3	0.22131	0.252109	12.875	21.0746	0.0307989	-0.422267	-1.09821	1.63687	S_o	1_S_o
1	Open	Spirodela	3.5	30.7	81.5	1673.3	0.19674	0.249893	8.77143	20.5313	0.0531531	-0.42551	-1.06394	2.3407	S_o	1_S_o
1	Open	Spirodela	5	53	111.5	2290.6	0.194037	0.235392	10.6	20.5435	0.0413557	-0.425837	-1.08171	1.93807	S_o	1_S_o
2	Open	Lemna	12	33	616.5	2752.44	0.246197	0.276483	2.75	4.46462	0.0302864	-0.41847	-1.09902	1.6235	L_o	2_L_o
2	Open	Lemna	12	32.3	627	3582.2	0.247252	0.294292	2.69167	5.71324	0.0470391	-0.418297	-1.07307	2.12256	L_o	2_L_o
2	Open	Lemna	12	32.5	505.5	2344.8	0.23379	0.26742	2.70833	4.63858	0.0336297	-0.420428	-1.09372	1.71271	L_o	2_L_o
2	Open	Lemna	12	36.1	800	3915.82	0.262482	0.292905	3.00833	4.89477	0.0304238	-0.415699	-1.0988	1.62707	L_o	2_L_o
2	Open	Lemna	12	36.1	622.5	3062.01	0.246802	0.277533	3.00833	4.91889	0.030731	-0.418371	-1.09831	1.63509	L_o	2_L_o
2	Open	Lemna	12	32.3	611.5	3006.11	0.245688	0.283333	2.69167	4.91595	0.0376453	-0.418553	-1.08744	1.82636	L_o	2_L_o
2	Open	Lemna	12	29.3	564	2929.33	0.240634	0.287809	2.44167	5.19385	0.0471747	-0.419364	-1.07287	2.12718	L_o	2_L_o
2	Open	Lemna	12	31.9	551	2786	0.239177	0.27936	2.65833	5.05626	0.040183	-0.419594	-1.08351	1.90204	L_o	2_L_o
2	Open	Lemna	9	32.4	347	1952.2	0.228256	0.25616	3.6	5.62594	0.0279033	-0.421259	-1.10285	1.56276	L_o	2_L_o
2	Open	Lemna	12	37.6	675.5	3841.17	0.251909	0.289158	3.13333	5.68642	0.0372489	-0.417524	-1.08805	1.81481	L_o	2_L_o
2	Open	Spirodela	4	38.6	134	2497.6	0.219472	0.260615	9.65	18.6388	0.041143	-0.422527	-1.08204	1.93148	S_o	2_S_o
2	Open	Spirodela	5	51.8	132.5	2928.7	0.204822	0.252183	10.36	22.1034	0.0473612	-0.424498	-1.07259	2.13353	S_o	2_S_o
2	Open	Spirodela	5.5	43.9	130.5	2503.1	0.197914	0.252711	7.98182	19.1808	0.0547966	-0.425367	-1.06151	2.40307	S_o	2_S_o
2	Open	Spirodela	4.5	51.1	180	3109.3	0.230555	0.256773	11.3556	17.2739	0.0262181	-0.420917	-1.10559	1.52118	S_o	2_S_o
2	Open	Spirodela	5	53.8	148	2903.3	0.211736	0.249271	10.76	19.6169	0.0375347	-0.423589	-1.08761	1.82313	S_o	2_S_o
2	Open	Spirodela	4.5	41.6	184	3443.8	0.231929	0.276014	9.24444	18.7163	0.0440858	-0.420711	-1.07754	2.0246	S_o	2_S_o
2	Open	Spirodela	4.5	42.3	164	3152.7	0.224737	0.269452	9.4	19.2238	0.0447149	-0.421775	-1.07659	2.04508	S_o	2_S_o
2	Open	Spirodela	5	43.2	171.5	3180.2	0.220947	0.268679	8.64	18.5434	0.0477321	-0.422318	-1.07203	2.14623	S_o	2_S_o
2	Open	Spirodela	7	58.3	178.5	3016.3	0.202417	0.246637	8.32857	16.898	0.0442191	-0.424805	-1.07734	2.02892	S_o	2_S_o
2	Open	Spirodela	5	42.5	213	4350.4	0.234491	0.289282	8.5	20.4244	0.0547915	-0.420321	-1.06151	2.40287	S_o	2_S_o
3	Open	Lemna	12	38.6	608	3162.3	0.245329	0.275363	3.21667	5.20115	0.0300334	-0.418611	-1.09943	1.61694	L_o	3_L_o
3	Open	Lemna	12	34.1	459	2763.1	0.227759	0.274676	2.84167	6.01983	0.0469167	-0.421333	-1.07326	2.11841	L_o	3_L_o
3	Open	Lemna	12	38.3	626.5	3631.3	0.247203	0.284494	3.19167	5.79617	0.0372909	-0.418305	-1.08799	1.81603	L_o	3_L_o
3	Open	Lemna	12	33.2	508.5	2703.5	0.23416	0.274985	2.76667	5.31662	0.0408246	-0.420372	-1.08253	1.92167	L_o	3_L_o
3	Open	Lemna	12	35.2	526	2661.3	0.236275	0.270345	2.93333	5.05951	0.0340706	-0.420046	-1.09302	1.72483	L_o	3_L_o
3	Open	Lemna	12	28.5	500	2147.4	0.233106	0.270132	2.375	4.2948	0.0370255	-0.420532	-1.0884	1.80834	L_o	3_L_o
3	Open	Lemna	12	32.9	551	2995.11	0.239177	0.281954	2.74167	5.43578	0.0427773	-0.419594	-1.07954	1.98265	L_o	3_L_o
3	Open	Lemna	12	34.4	553	2883.4	0.239403	0.276792	2.86667	5.2141	0.0373886	-0.419558	-1.08783	1.81887	L_o	3_L_o
3	Open	Lemna	12	33.7	487.5	2752.6	0.231524	0.275175	2.80833	5.64636	0.0436512	-0.420772	-1.0782	2.01057	L_o	3_L_o
3	Open	Lemna	12	31.6	470.5	1905.7	0.229306	0.256215	2.63333	4.05037	0.0269099	-0.421104	-1.10446	1.53812	L_o	3_L_o
3	Open	Spirodela	5.5	60.2	138.5	3250.3	0.201633	0.249302	10.9455	23.4679	0.0476692	-0.424904	-1.07213	2.14407	S_o	3_S_o
3	Open	Spirodela	4	38.3	73	1472.8	0.18151	0.228092	9.575	20.1753	0.0465816	-0.427277	-1.07376	2.10709	S_o	3_S_o
3	Open	Spirodela	4.5	47.5	85	1768	0.183661	0.226055	10.5556	20.8	0.0423938	-0.427038	-1.08012	1.97053	S_o	3_S_o
3	Open	Spirodela	4	53.9	111	2557.3	0.207702	0.241224	13.475	23.0387	0.0335213	-0.424124	-1.09389	1.70974	S_o	3_S_o
3	Open	Spirodela	4.5	50.7	88	1890.6	0.185829	0.22617	11.2667	21.4841	0.0403415	-0.426795	-1.08327	1.90687	S_o	3_S_o
3	Open	Spirodela	6	48.8	128.5	3196.4	0.191511	0.261378	8.13333	24.8747	0.0698675	-0.426138	-1.03963	3.05837	S_o	3_S_o
3	Open	Spirodela	5	57.3	102	2636.9	0.188471	0.239316	11.46	25.852	0.0508452	-0.426492	-1.06737	2.25584	S_o	3_S_o
3	Open	Spirodela	6.5	55	135	2710.7	0.189592	0.243602	8.46154	20.0793	0.0540098	-0.426362	-1.06267	2.373	S_o	3_S_o
3	Open	Spirodela	5	40.6	94.5	1945.5	0.183698	0.241844	8.12	20.5873	0.0581465	-0.427034	-1.05658	2.53538	S_o	3_S_o
3	Open	Spirodela	4	43.7	77.5	2051.7	0.185249	0.240567	10.925	26.4735	0.0553183	-0.42686	-1.06074	2.42321	S_o	3_S_o
															Codes for Kruskal-Wallis ANOVA
1 - 125 µmol photons m–2 s–1
2 - 236
3 - 459
